# Supplementary material for: Environmental precursors to rapid light carbon injection at the Palaeocene/Eocene boundary
Source: Springer Nature journal article supplement (doi:10.1038/nature06400), 2007-12-01
Supplement: 41586_2007_BFnature06400_MOESM444_ESM.pdf [file 41586_2007_BFnature06400_MOESM444_ESM.pdf]

## Supplementary Information

### Environmental precursors to rapid light carbon injection at the Palaeocene/Eocene boundary

Appy Sluijs, Henk Brinkhuis, Stefan Schouten, Steven M. Bohaty, Cédric M. John, James C. Zachos, Gert-Jan Reichart, Jaap S. Sinninghe Damsté, Erica M. Crouch, Gerald R. Dickens

This section contains four figures and additional references. Figures S1 and S2 comprise the complete records of the New Jersey sites Bass River and Wilson Lake, respectively. Figure S3 includes data that shows that the onset of the *Apectodinium* acme also occurred prior to the carbon isotope excursion (CIE) in the North Sea and the southwest Pacific Ocean. Potential precession forcing on the dinocyst records at Bass River is discussed (Figure S4). Finally, we discuss the cause of the *Apectodinium* acme and planktonic foraminifer  $\delta^{18}\text{O}$  data.

#### Organic hypnozygotic dinoflagellate cysts (dinocysts)

Dinoflagellates are single-celled, predominantly marine, eukaryotic plankton that typically occur as motile cells in surface waters<sup>1</sup>. As part of their life cycle, some dinoflagellates produce organic (hypnozygotic) resting cysts (dinocysts). This dormant or 'cyst' part of the dinoflagellate life cycle is related to sexual reproduction. Cyst formation is induced by particular surface water parameters, usually nutrient depletion following a bloom<sup>1</sup>. Typically, the motile stage does not preserve, but organic dinocysts are very resistant to oxidation and are found from the Late Triassic onwards<sup>3</sup>. Records from the deep sea are rare, primarily because oxidation hampers their preservation in such environments, so they are mostly found in siliciclastic sediments deposited on the shelf or slope.

#### Derivation of maps in Figure 1.

The maps that represent the left and right panel in Figure 1 are modified from refs. 4 and 5, respectively.

#### Potential precession forcing on *Apectodinium* abundance at Bass River

Estimates for the duration of the CIE range between 130 kyr and 220 kyr<sup>6,7</sup> but was likely close to 170 kyr<sup>8-10</sup>. Accepting this number gives sedimentation rates through the 10.3 meter thick CIE at Bass River (Fig. S1) of  $\sim 6.1 \text{ cm.kyr}^{-1}$ . However, the upper bound of the CIE in this section is represented by a (sea level) sequence boundary<sup>11,12</sup>, which implies that the upper part of the CIE is not represented here. Omitting this truncation skews sedimentation rate estimates across the CIE towards lower values. However, we speculate that the 5 or 6 cyclic fluctuations in the relative and absolute abundance records of *Apectodinium* and the number of dinocysts per gram of sediment could be related to climatic forcing in the precession band (Fig. S4). Ecologically, this would imply that neritic surface water parameters (likely salinity, since the abundance of low-salinity tolerant taxa varies in anti-phase with the *Apectodinium* abundance; Fig. S4) varied as a result of precession forcing, which has been recorded many times in dinocyst records from neritic Eocene deposits<sup>13,14</sup>. Five cycles are present in the record, but considering that the lower one is associated with transgressive systems tract and thus likely with slightly lower sedimentation rates<sup>12</sup> (Fig. S4) this may actually represent two precession cycles. However, the lower one of these two predates the CIE, so 5 cycles are present within the CIE. Five cycles would imply that  $\sim 100 \text{ kyr}$  of PETM section is present at Bass River, resulting in average sedimentation rates of  $\sim 10 \text{ cm.kyr}^{-1}$  within the PETM.

## Bass River, New Jersey

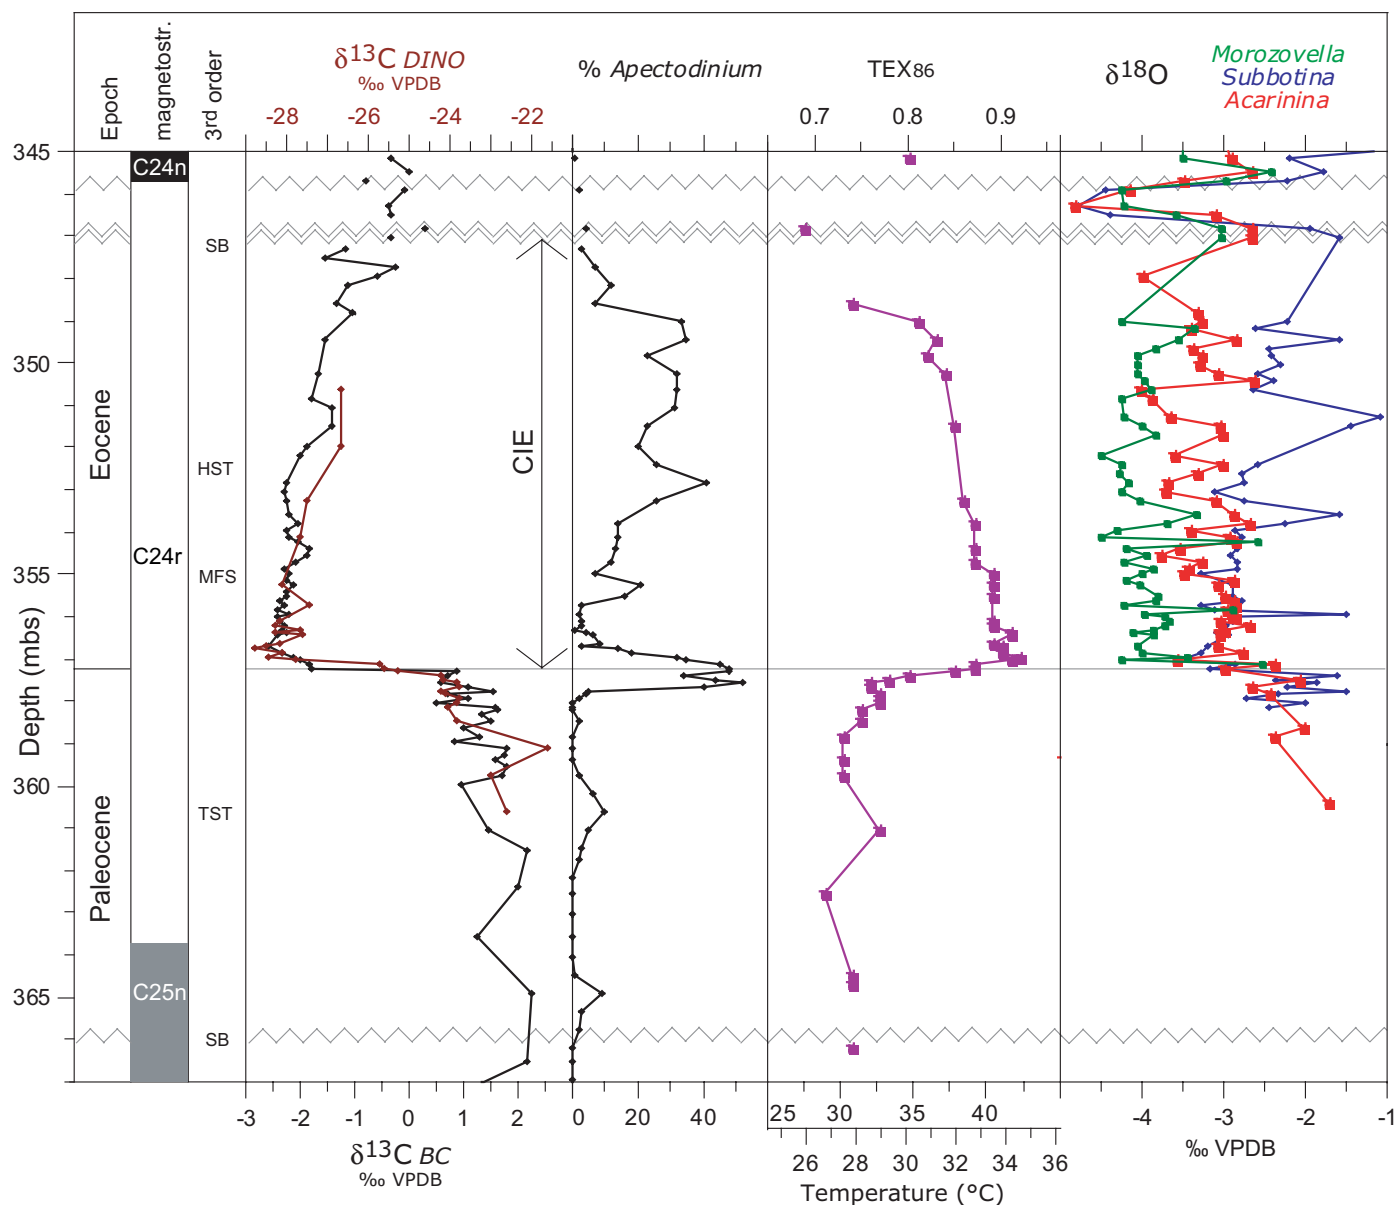

**Figure S1.** High-resolution records across the entire PETM interval at Bass River, New Jersey. Figure 2a in the main text represents a zoom of this record across the onset of the CIE. Solid horizontal line at ~357.3 mbs represents the onset of the CIE. BC = bulk carbonate, DINO = dinocysts, VPDB = Vienna Pee Dee Belemnite, mbs = meters below surface. Zigzag lines represent sequence boundaries, adapted from refs. 11, 12. Scales at TEX86 temperatures represent calibrations from ref. 24 for the top bar and from ref. 25 for the lower bar. Stable oxygen isotope data on foraminifera are from ref. 23.

## Wilson Lake, New Jersey

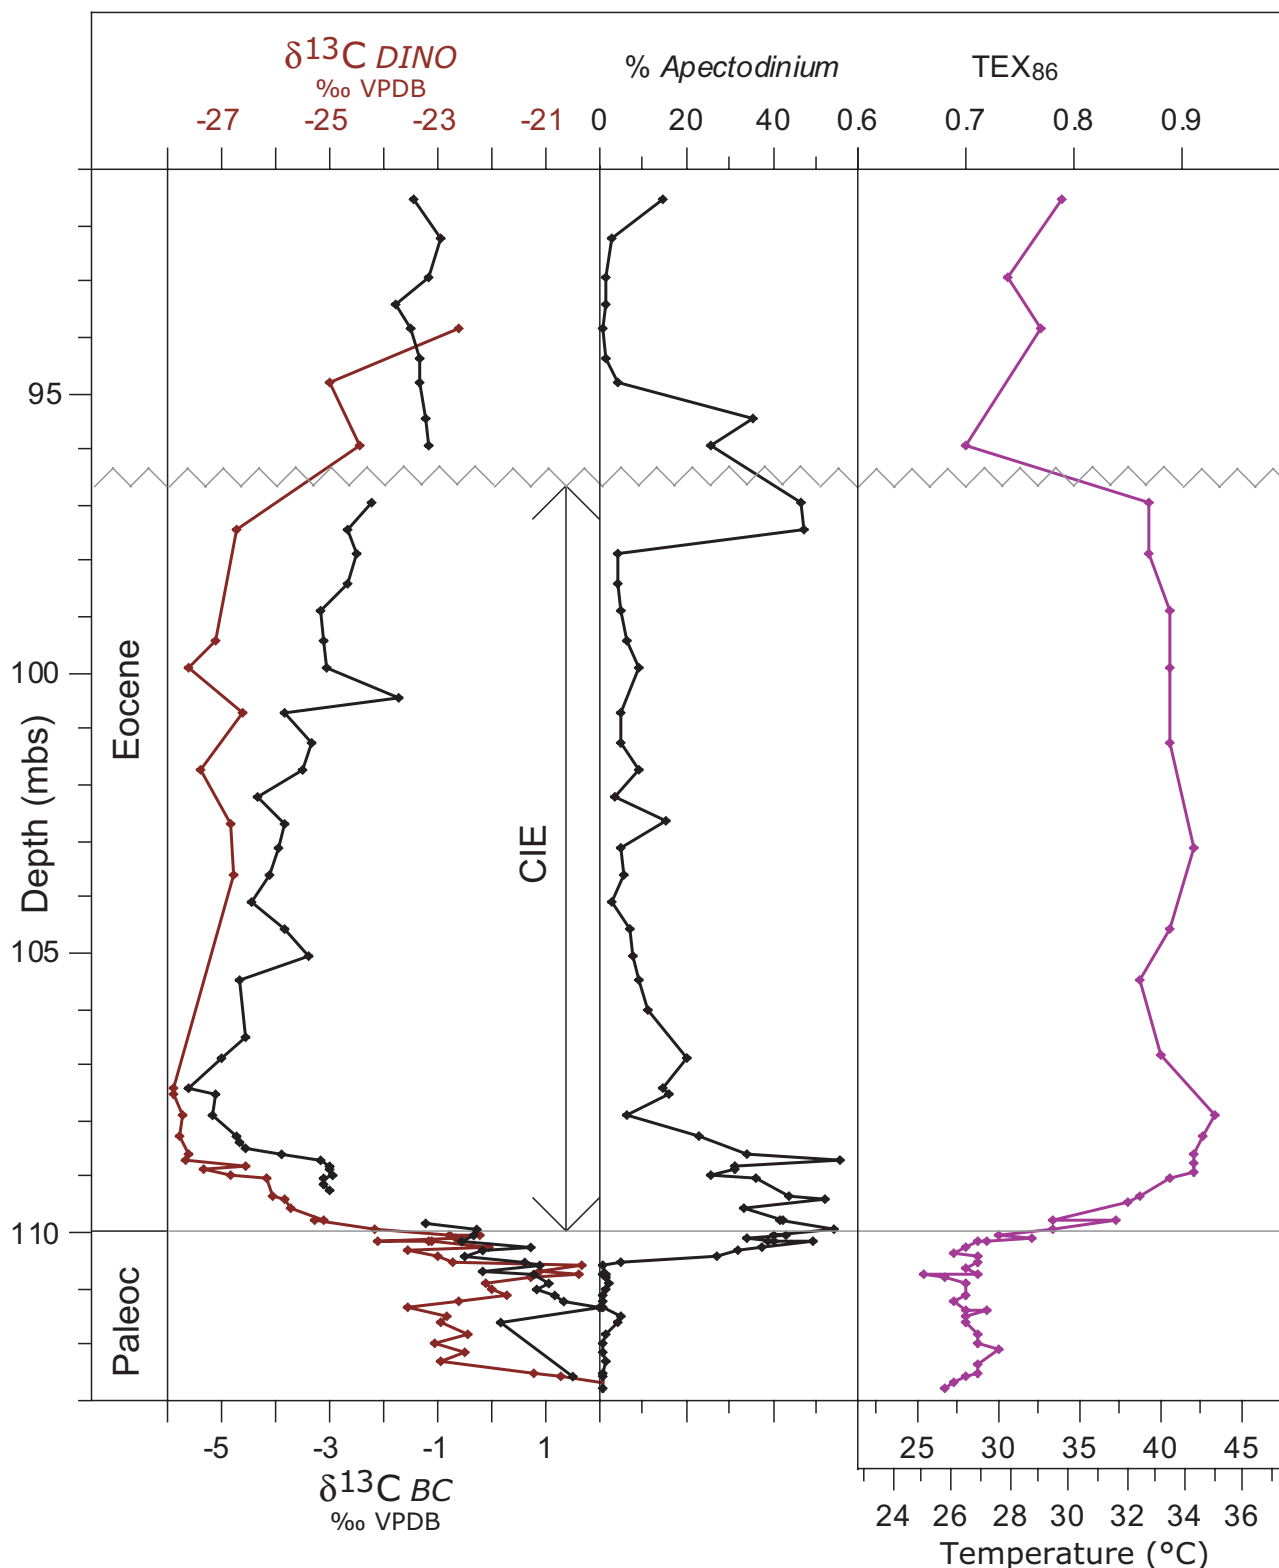

**Figure S2.** High-resolution records across the PETM at Wilson Lake, New Jersey. Figure 2b in the main text represents a zoom of this record across the onset of the CIE. Solid horizontal line at ~110.0 mbs represents the onset of the CIE. Zigzag lines represent sequence boundaries, adapted from refs. 12, 22, 26. BC = bulk carbonate, DINO = dinocysts, VPDB = Vienna Pee Dee Belemnite, mbs = meters below surface.  $\text{TEX}_{86}$  data partially from ref. 22 (see Table S1 for details).

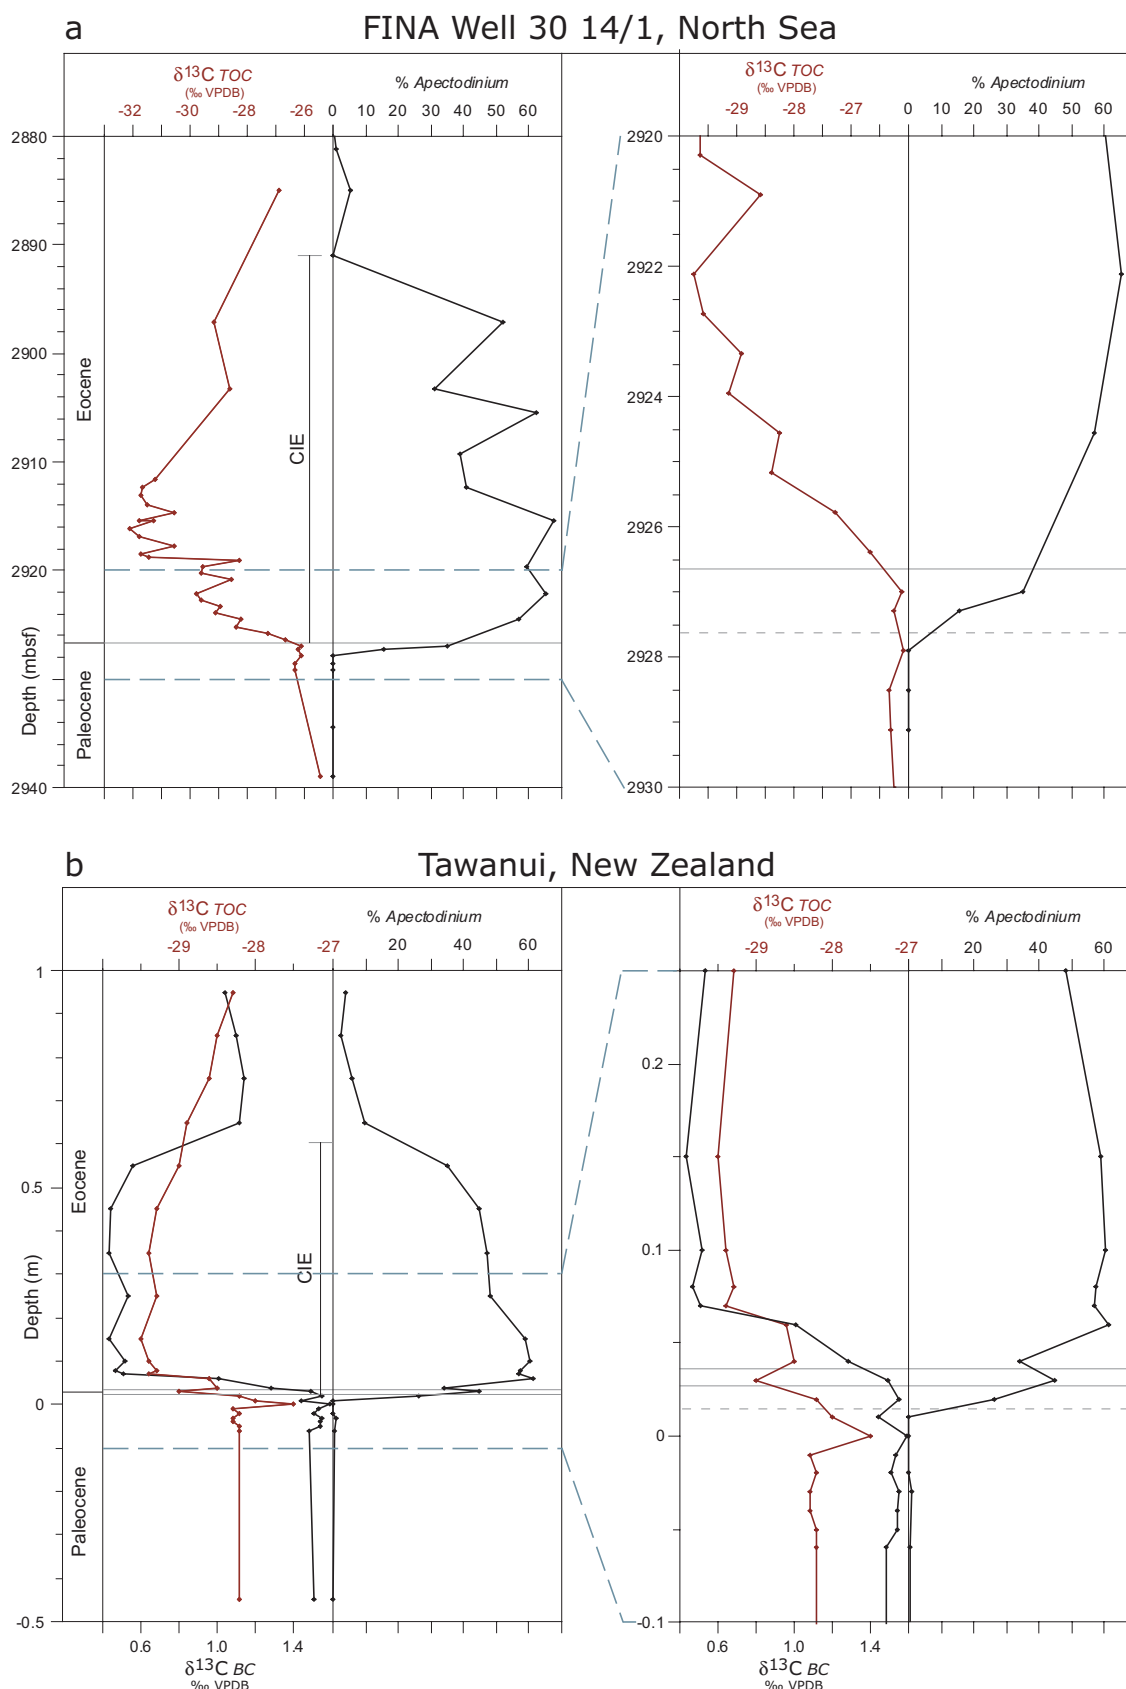

**Figure S3.** FINA Well 30 14/1, North Sea (**a**) and Tawanui, New Zealand (**b**). Tawanui data are from refs. 16, 17. Left panels represent the entire PETM records, right panels show an enlarged view on the intervals around the onset of the CIE. Solid lines indicate the onset of the CIE (two options for Tawanui), while dashed lines mark the onset of the *Apectodinium* acme. DINO = dinocysts, TOC = Total Organic Carbon, VPDB = Vienna Pee Dee Belemnite, mbs = meters below surface, mbsf = meters below sea floor.

## The *Apectodinium* acme and the CIE in the North Sea and southwest Pacific

We also studied industry well FINA 30/14-1, from the central North Sea at  $\sim 55^\circ\text{N}$  palaeolatitude (Fig. 1). At this central North Sea site, we identified the PETM based on the occurrence of a negative CIE in  $\delta^{13}\text{C}$  records of total organic carbon ( $\delta^{13}\text{C}_{\text{TOC}}$ ) (Fig. S3), and by the presence of the dinoflagellate species *Apectodinium augustum*, which is diagnostic of the PETM<sup>15</sup>. The CIE is  $\sim 37$  m thick at this site (Fig. S3). The onset of the CIE is at  $\sim 2926.7$  meters below sea floor (mbsf) and its termination approximately 37 meters higher (Fig. S3). Given a duration of 170 kyr for the CIE<sup>8-10</sup>, average sedimentation rate at this site were  $\sim 22$  cm.kyr<sup>-1</sup>. The onset of the *Apectodinium* acme is 80 cm below the onset of the CIE at  $\sim 2927.5$  mbsf, implying that also at this site the onset of the acme again leads the CIE by about 4 kyr. Notably, this site is located in the central North Sea, so sedimentation rates were presumably fairly constant near the start of the PETM.  $\text{TEX}_{86}$  palaeothermometry is not possible on the sediments from the North Sea section; the crenarchaeotal membrane lipids are not present because of the relatively high maturity of the organic matter.

Although less obvious, this sequence of events is supported by the records from the condensed Tawanui section in New Zealand, deposited in upper bathyal water depths at  $\sim 55^\circ\text{S}$  palaeolatitude in the southwest Pacific Ocean<sup>16,17</sup> (Fig. 1). The onset of the CIE in this section is somewhat ambiguous: typical latest Palaeocene values in the  $\delta^{13}\text{C}_{\text{BC}}$  record occur up to 0.04 m (Fig. S3), but background values in the  $\delta^{13}\text{C}_{\text{TOC}}$  record are present up to 0.03 m. Above this level, the CIE starts. The onset of the *Apectodinium* acme is at 0.02 m and, hence, below the CIE (Fig. S3). Calculation of the time lag involved is complicated by the condensed nature of this section.

## The causes of the global *Apectodinium* acme

Identification of the environmental parameters that caused the *Apectodinium* acme is vital in understanding the sequence of climatological events that eventually caused the warming and the CIE. Crouch et al. (ref. 18, p. 125) note that any *Apectodinium* bloom required “a special set of environmental conditions” of which a baseline requirement appears to be high temperatures. *Apectodinium* acmes have been recorded from upper Palaeocene deposits in the Tethyan Ocean<sup>19</sup>, suggesting that conditions there were episodically and locally similar to those on a global scale during the PETM<sup>18</sup>. Similar to other mid-latitude regions, *Apectodinium* was already present on the New Jersey shelf at least since Chron C25n (Fig. S1); yet, in contrast to low-latitude sites<sup>19</sup> no pre-PETM acmes have been reported from such regions. Since *Apectodinium* was abundant in the Arctic Ocean with SSTs around  $23^\circ\text{C}$  (ref. 20), New Jersey shelf SSTs during the late Palaeocene should have already been high enough to allow for abundant *Apectodinium*. This implies that some other environmental parameter(s) prevented the establishment of late Palaeocene *Apectodinium* acmes in the mid latitudes.

It has been noted that *Apectodinium* locally became outnumbered by typical low-salinity tolerant dinocysts during the PETM<sup>20</sup>. This observation is consistent with the records from the New Jersey shelf (Fig. S4), indicating that very low salinities were not optimal for *Apectodinium*. Other proposed ecological requirements include stratified surface waters<sup>18</sup>. Moreover *Apectodinium* has morphological characteristics identical to cysts of modern heterotrophic dinoflagellates, which has fueled the hypothesis that *Apectodinium* was a heterotrophic dinoflagellate<sup>15</sup>. Basic predator-prey abundance models indicate that with higher nutrient supplies, ecosystems should become relatively enriched in organisms that are higher up in the food chain, i.e., heterotrophic. The total amount of dinoflagellate cysts per gram of sediment, which reflects cyst production and thereby nutrient supply during the PETM at Bass River, co-varies with the absolute abundance of *Apectodinium* cysts (Fig. S4). This suggests that higher nutrient levels are directly reflected in higher production of *Apectodinium* cysts, supporting the hypothesis that *Apectodinium* was a heterotrophic dinoflagellate. Increasing nutrient levels may, therefore, have contributed to the *Apectodinium* acme. If so, the global character of the acme implies that at least neritic sections underwent significant eutrophication on a global scale<sup>15,16</sup>, a hypothesis corroborated by many proxy data (see overview in ref. 10). Modern dinoflagellate blooms usually last for several days to weeks<sup>21</sup>. Conceivably, *Apectodinium* blooms during the PETM had similar dynamics, in which case the pre-CIE signal would imply a change in specific seasonal conditions of the surface waters. This may include any of the above environmental factors. However, even a combination of these factors was likely not truly unique in the early Palaeogene, suggesting that some critical environmental factor has not yet been identified. Whichever combination of surface water parameters caused the global acme of *Apectodinium*, it is consistently associated with the PETM and appears to signify a harbinger to global warming and carbon injection.

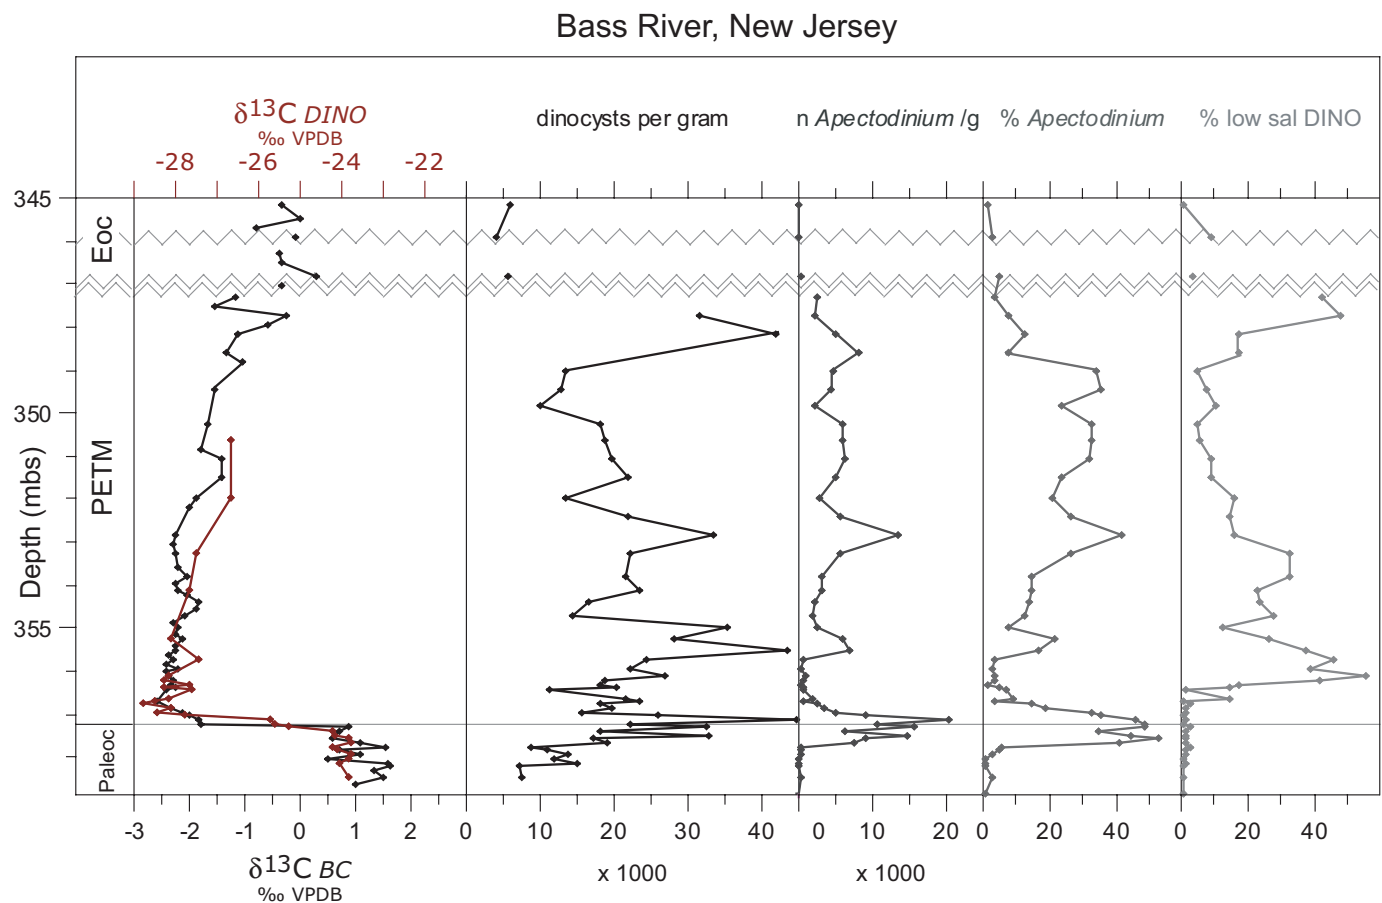

**Figure S4.** High-resolution dinocyst records across the PETM at Bass River. See pages 1 and 5 for discussion. Bulk carbonate stable isotope data from ref. 23. BC = bulk carbonate, DINO = dinocysts, low sal = low salinity tolerant, VPDB = Vienna Pee Dee Belemnite, mbs = meters below surface.

### New Jersey planktonic foraminifer $\delta^{18}\text{O}$ records

At Bass River and Wilson Lake, surface dwelling foraminifer  $\delta^{18}\text{O}$  data have been generated<sup>22,23</sup>. At Bass River, the negative  $\delta^{18}\text{O}$  excursions in the surface dwellers *Acaranina* ( $\sim -0.6\text{‰}$ ) and *Morozovella* ( $\sim -0.9\text{‰}$ ) are rather small and imply only  $\sim 3\text{ }^{\circ}\text{C}$  warming of surface waters, assuming no change in salinity<sup>23</sup>. However, the Bass River and Wilson Lake  $\text{TEX}_{86}$  records and the Wilson Lake planktonic foraminifer  $\delta^{18}\text{O}$  record consistently point to  $7\text{--}9\text{ }^{\circ}\text{C}$  of surface ocean warming on the New Jersey Shelf. These issues indicate that factors other than temperature, such as variations in seawater  $\delta^{18}\text{O}$  and diagenesis, influenced the planktonic foraminifer  $\delta^{18}\text{O}$  record at Bass River. Moreover, single shell  $\delta^{18}\text{O}$  values from individual samples show a large spread ( $\sim 1\text{‰}$ )<sup>23</sup>, with standard deviations of  $\sim 0.5\text{‰}$ . Such a spread is common in modern populations of planktonic foraminifera but this alone implies  $2\text{ }^{\circ}\text{C}$  uncertainty in the  $\delta^{18}\text{O}$ -derived relative temperature estimates. Because of the large scatter and high standard deviations from single shell analyses, within and between samples, it is hard to pinpoint the stratigraphic level at which the values start to decrease. Critically, no foraminifera suitable for  $\delta^{18}\text{O}$  analysis were present in the sample at  $357.30\text{ mbs}$ , just below the onset of the CIE, potentially due to dissolution.

At Wilson Lake, only few planktonic foraminifera suitable for  $\delta^{18}\text{O}$  analyses are present below the CIE<sup>22</sup>. These values are  $1.5\text{--}2\text{‰}$  higher than PETM values, evidencing that the magnitude of sea surface warming at Wilson Lake comprised  $\sim 6\text{--}8\text{ }^{\circ}\text{C}$  during the PETM<sup>22</sup>. However, due to the scarcity of data below the CIE, the stratigraphic level at which foraminifer  $\delta^{18}\text{O}$  values start to decrease is unclear.

## Supplementary References

1. Taylor, F. J. R. (ed.) The biology of dinoflagellates (Blackwell Scientific Publications, London, 1987).
2. Fensome, R. A., Gocht, H. & Williams, G. L. The Eisenack Catalog of Fossil Dinoflagellates. New Series. Volume 4 (E. Schweizerbart'sche Verlagsbuchhandlung, Stuttgart, Germany, 1996).
3. MacRae, R. A., Fensome, R. A. & Williams, G. L. Fossil dinoflagellate diversity, originations, and extinctions and their significance. *Canadian Journal of Botany* **74**, 1687-1694 (1996).
4. Miller, K. G. in Proceedings of the Ocean Drilling Program, Scientific Results, Volume 150X (eds. Miller, K. G. & Snyder, S. W.) 3-12 (Ocean Drilling Program, College Station, TX, 1997).
5. Scotese, C. P. & Golanka, J. Paleogeographic atlas, PALEOMAP progress report 20-0692 (University of Texas, Arlington, 1992).
6. Farley, K. A. & Eltgroth, S. F. An alternative age model for the Paleocene-Eocene thermal maximum using extraterrestrial  $^3\text{He}$ . *Earth and Planetary Science Letters* **208**, 135-148 (2003).
7. Röhl, U., Bralower, T. J., Norris, G. & Wefer, G. A new chronology for the late Paleocene thermal maximum and its environmental implications. *Geology* **28**, 927-930 (2000).
8. Röhl, U., Westerhold, T., Bralower, T. J. & Zachos, J. C. in Climate and Biota of the Early Paleogene (CBEP2006). 112 (Bilbao, Spain, 2006).
9. Abdul Aziz, H., Gingerich, P. D., Hilgen, F. J., van Luijk, G. & Sluijs, A. in Climate and Biota of the Early Paleogene (CBEP2006). 1 (Bilbao, Spain, 2006).
10. Sluijs, A., Bowen, G. J., Brinkhuis, H., Lourens, L. J. & Thomas, E. in Deep time perspectives on Climate Change (eds. Williams, M., Haywood, A., Gregory, J. & Schmidt, D. N.) (Geological Society of London, TMS Special Publication, London, in press, November 2007).
11. Cramer, B. S. et al. An exceptional chronologic, isotopic, and clay mineralogic record of the latest Paleocene thermal maximum, Bass River, NJ, ODP 174AX. *Bulletin de la Société Géologique de France* **170**, 883-897 (1999).
12. Sluijs, A. Global Change during the Paleocene-Eocene thermal maximum (Laboratory of Palaeobotany and Palynology Foundation No. 21, Utrecht, The Netherlands, 2006).
13. Röhl, U. et al. in The Cenozoic Southern Ocean: Tectonics, Sedimentation, and Climate Change Between Australia and Antarctica. American Geophysical Union Geophysical Monograph Series, 151 (eds. Exon, N. F., Malone, M. & Kennett, J. P.) 127-151 (2004).
14. Warnaar, J. Climatological Implications of Australian-Antarctic Separation (Laboratory of Palaeobotany and Palynology Foundation No. 22, Utrecht, The Netherlands, 2006).
15. Bujak, J. P. & Brinkhuis, H. in Late Paleocene - early Eocene climatic and biotic events in the marine and terrestrial records (eds. Aubry, M.-P., Lucas, S. G. & Berggren, W. A.) 277-295 (Columbia University Press, New York, 1998).
16. Crouch, E. M. et al. Global dinoflagellate event associated with the late Paleocene thermal maximum. *Geology* **29**, 315-318 (2001).
17. Crouch, E. M. et al. The *Apectodinium* acme and terrestrial discharge during the Paleocene-Eocene thermal maximum: new palynological, geochemical and calcareous nannoplankton observations at Tawanui, New Zealand. *Palaeogeography, Palaeoclimatology, Palaeoecology* **194**, 387-403 (2003).
18. Crouch, E. M., Brinkhuis, H., Visscher, H., Adatte, T. & Bolle, M.-P. in Causes and Consequences of Globally Warm Climates in the Early Paleogene. Geological Society of America Special Paper 369 (eds. Wing, S. L., Gingerich, P. D., Schmitz, B. & Thomas, E.) 113-131 (Geological Society of America, Boulder, Colorado, 2003).
19. Iakovleva, A. I., Brinkhuis, H. & Cavagnetto, C. Late Palaeocene-Early Eocene dinoflagellate cysts from the Turgay Strait, Kazakhstan; correlations across ancient seaways. *Palaeogeography, Palaeoclimatology, Palaeoecology* **172**, 243-268 (2001).
20. Sluijs, A. et al. Subtropical Arctic Ocean temperatures during the Palaeocene/Eocene thermal maximum. *Nature* **441**, 610-613 (2006).
21. Dale, B. in Palynology: Principles and Applications (eds. Jansonius, J. & McGregor, D. C.) 1249-1276 (American Association of Stratigraphic Palynologists Foundation, Dallas, 1996).
22. Zachos, J. C. et al. Extreme warming of mid-latitude coastal ocean during the Paleocene-Eocene Thermal Maximum: Inferences from  $\text{TEX}_{86}$  and Isotope Data. *Geology* **34**, 737-740 (2006).
23. Zachos, J. C. et al. The Palaeocene-Eocene carbon isotope excursion: constraints from individual shell planktonic foraminifer records. *Philosophical Transactions of the Royal Society A* **365**, 1829-1842 (2007).
24. Schouten, S., Hopmans, E. C., Schefuß, E. & Sinninghe Damsté, J. S. Distributional variations in marine crenarchaeotal membrane lipids: a new tool for reconstructing ancient sea water temperatures? *Earth and Planetary Science Letters* **204**, 265-274 (2002).
25. Schouten, S. et al. Extremely high sea-surface temperatures at low latitudes during the middle Cretaceous as revealed by archaeal membrane lipids. *Geology* **31**, 1069-1072 (2003).
26. Gibbs, S. J., Bralower, T. J., Bown, P. R., Zachos, J. C. & Bybell, L. M. Shelf and open-ocean calcareous phytoplankton assemblages across the Paleocene-Eocene Thermal Maximum: Implications for global productivity gradients. *Geology* **34**, 233-236 (2006).

**Table S1 (next page).** Palynological,  $\text{TEX}_{86}$  and isotope data of sites **a.** Bass River, **b.** Wilson Lake and **c.** North Sea.



Table 1a. Bass River

| Bass River Dinocyst assemblage data |                     |               |                        |           |              |                |                       |                                   |                                    |                                                |
|-------------------------------------|---------------------|---------------|------------------------|-----------|--------------|----------------|-----------------------|-----------------------------------|------------------------------------|------------------------------------------------|
| top (feet)                          | top (tenth of feet) | bottom (feet) | bottom (tenth of feet) | top (mbs) | bottom (mbs) | Av depth (mbs) | % <i>Apectodinium</i> | % low salinity tolerant dinocysts | n <i>Apectodinium</i> / g sediment | n low salinity tolerant dinocysts / g sediment |
| 1132                                | 4                   | 1132          | 5                      | 345.16    | 345.19       | 345.17         | 1                     | 0                                 | 77                                 | 26                                             |
| 1134                                | 9                   | 1135          | 0                      | 345.92    | 345.95       | 345.93         | 2                     | 9                                 | 61                                 | 333                                            |
| 1137                                | 8                   | 1137          | 9                      | 346.80    | 346.83       | 346.82         | 4                     | 3                                 | 207                                | 145                                            |
| 1139                                | 4                   | 1139          | 5                      | 347.29    | 347.32       | 347.30         | 3                     | 43                                | 2471                               | 36185                                          |
| 1140                                | 8                   | 1140          | 9                      | 347.72    | 347.75       | 347.73         | 7                     | 51                                | 2189                               | 14869                                          |
| 1142                                | 3                   | 1142          | 4                      | 348.17    | 348.20       | 348.19         | 12                    | 19                                | 4929                               | 7159                                           |
| 1143                                | 7                   | 1143          | 8                      | 348.60    | 348.63       | 348.62         | 7                     | 18                                | 8127                               | 19810                                          |
| 1145                                | 1                   | 1145          | 2                      | 349.03    | 349.06       | 349.04         | 33                    | 5                                 | 4534                               | 488                                            |
| 1146                                | 4                   | 1146          | 5                      | 349.42    | 349.45       | 349.44         | 35                    | 10                                | 4409                               | 855                                            |
| 1147                                | 7                   | 1147          | 8                      | 349.82    | 349.85       | 349.83         | 23                    | 13                                | 2266                               | 977                                            |
| 1149                                | 1                   | 1149          | 2                      | 350.25    | 350.28       | 350.26         | 32                    | 6                                 | 5914                               | 749                                            |
| 1150                                | 4                   | 1150          | 5                      | 350.64    | 350.67       | 350.66         | 32                    | 8                                 | 5888                               | 981                                            |
| 1151                                | 8                   | 1151          | 9                      | 351.07    | 351.10       | 351.08         | 31                    | 11                                | 6123                               | 1498                                           |
| 1153                                | 2                   | 1153          | 3                      | 351.50    | 351.53       | 351.51         | 23                    | 10                                | 5072                               | 1741                                           |
| 1154                                | 7                   | 1154          | 8                      | 351.95    | 351.98       | 351.97         | 20                    | 19                                | 2717                               | 2038                                           |
| 1156                                | 1                   | 1156          | 2                      | 352.38    | 352.41       | 352.39         | 26                    | 19                                | 5745                               | 3093                                           |
| 1157                                | 5                   | 1157          | 6                      | 352.81    | 352.84       | 352.82         | 41                    | 25                                | 13589                              | 4901                                           |
| 1158                                | 9                   | 1159          | 0                      | 353.23    | 353.26       | 353.25         | 26                    | 43                                | 5749                               | 7066                                           |
| 1160                                | 7                   | 1160          | 8                      | 353.78    | 353.81       | 353.80         | 14                    | 37                                | 3110                               | 6823                                           |
| 1161                                | 7                   | 1161          | 8                      | 354.09    | 354.12       | 354.10         | 14                    | 26                                | 3230                               | 5249                                           |
| 1162                                | 7                   | 1162          | 8                      | 354.39    | 354.42       | 354.41         | 13                    | 26                                | 2227                               | 3780                                           |
| 1163                                | 7                   | 1163          | 8                      | 354.70    | 354.73       | 354.71         | 12                    | 30                                | 1730                               | 3833                                           |
| 1164                                | 6                   | 1164          | 7                      | 354.97    | 355.00       | 354.99         | 7                     | 12                                | 2541                               | 4065                                           |
| 1165                                | 5                   | 1165          | 6                      | 355.24    | 355.27       | 355.26         | 21                    | 33                                | 6004                               | 7309                                           |
| 1166                                | 4                   | 1166          | 5                      | 355.52    | 355.55       | 355.53         | 16                    | 43                                | 6789                               | 15842                                          |
| 1167                                |                     | 1167          | 1                      | 355.70    | 355.73       | 355.72         | 3                     | 46                                | 716                                | 10845                                          |
| 1167                                | 7                   | 1167          | 8                      | 355.91    | 355.95       | 355.93         | 2                     | 39                                | 459                                | 8452                                           |
| 1168                                | 3                   | 1168          | 4                      | 356.10    | 356.13       | 356.11         | 3                     | 57                                | 787                                | 14719                                          |
| 1168                                | 6                   | 1168          | 7                      | 356.19    | 356.22       | 356.20         | 3                     | 43                                | 632                                | 7753                                           |
| 1168                                | 9                   | 1169          |                        | 356.28    | 356.31       | 356.30         | 1                     | 17                                | 260                                | 3119                                           |
| 1169                                | 2                   | 1169          | 3                      | 356.37    | 356.40       | 356.39         | 4                     | 15                                | 736                                | 2944                                           |
| 1169                                | 4                   | 1169          | 5                      | 356.43    | 356.46       | 356.45         | 6                     | 1                                 | 701                                | 140                                            |
| 1170                                | 1                   | 1170          | 2                      | 356.65    | 356.68       | 356.66         | 8                     | 15                                | 1801                               | 3025                                           |
| 1170                                | 2                   | 1170          | 3                      | 356.68    | 356.71       | 356.69         | 3                     | 0                                 | 733                                | 73                                             |
| 1170                                | 4                   | 1170          | 5                      | 356.74    | 356.77       | 356.75         | 14                    | 2                                 | 2539                               | 282                                            |
| 1170                                | 7                   | 1170          | 8                      | 356.83    | 356.86       | 356.84         | 18                    | 1                                 | 3504                               | 146                                            |



|      |     |      |     |        |        |        |    |    |       |      |
|------|-----|------|-----|--------|--------|--------|----|----|-------|------|
| 1171 | 1   | 1171 | 2   | 356.95 | 356.98 | 356.97 | 32 | 2  | 4914  | 218  |
| 1171 | 3   | 1171 | 4   | 357.01 | 357.04 | 357.03 | 35 | 0  | 8987  | 0    |
| 1171 | 6   | 1171 | 7   | 357.10 | 357.13 | 357.12 | 45 | 2  | 20275 | 531  |
| 1171 | 9   | 1172 |     | 357.20 | 357.23 | 357.21 | 48 | 0  | 10570 | 0    |
| 1172 | 2   | 1172 | 3   | 357.29 | 357.32 | 357.30 | 48 | 3  | 15568 | 512  |
| 1172 | 5   | 1172 | 6   | 357.38 | 357.41 | 357.39 | 34 | 1  | 6121  | 128  |
| 1172 | 8.5 | 1172 | 9   | 357.48 | 357.50 | 357.49 | 44 | 1  | 14559 | 199  |
| 1173 | 1   | 1173 | 2   | 357.56 | 357.59 | 357.58 | 52 | 2  | 8910  | 144  |
| 1173 | 4   | 1173 | 5   | 357.65 | 357.68 | 357.67 | 40 | 2  | 7641  | 196  |
| 1173 | 7   | 1173 | 8   | 357.74 | 357.77 | 357.76 | 5  | 2  | 439   | 135  |
| 1174 |     | 1174 | 1   | 357.84 | 357.87 | 357.85 | 4  | 1  | 416   | 104  |
| 1174 | 2   | 1174 | 3   | 357.90 | 357.93 | 357.91 | 2  | 1  | 205   | 164  |
| 1174 | 6   | 1174 | 7   | 358.02 | 358.05 | 358.03 | 0  | 0  | 0     | 0    |
| 1174 | 9   | 1175 |     | 358.11 | 358.14 | 358.12 | 0  | 1  | 55    | 110  |
| 1175 | 2   | 1175 | 3   | 358.20 | 358.23 | 358.22 | 0  | 0  | 28    | 28   |
| 1176 | 1   | 1176 | 2   | 358.48 | 358.51 | 358.49 | 2  | 0  | 170   | 0    |
| 1177 | 2   | 1177 | 3   | 358.81 | 358.84 | 358.83 | 0  | 0  | 0     | 0    |
| 1178 | 1   | 1178 | 2   | 359.08 | 359.12 | 359.10 | 0  | 0  | 114   | 114  |
| 1179 | 1   | 1179 | 2   | 359.39 | 359.42 | 359.40 | 0  | 0  | 0     | 56   |
| 1180 | 3   | 1180 | 4   | 359.76 | 359.79 | 359.77 | 2  | 0  | 337   | 0    |
| 1181 | 7   | 1181 | 8   | 360.18 | 360.21 | 360.20 | 6  | 0  | 747   | 53   |
| 1183 | 1   | 1183 | 2   | 360.61 | 360.64 | 360.62 | 10 | 1  | 1999  | 114  |
| 1184 | 5   | 1184 | 6   | 361.04 | 361.07 | 361.05 | 5  | 1  | 854   | 107  |
| 1185 | 9   | 1186 |     | 361.46 | 361.49 | 361.48 | 3  | 1  | 314   | 135  |
| 1186 | 7   | 1186 | 8   | 361.71 | 361.74 | 361.72 | 2  | 1  | 213   | 106  |
| 1188 | 1   | 1188 | 2   | 362.13 | 362.16 | 362.15 | 0  | 0  | 0     | 0    |
| 1189 | 5   | 1189 | 6   | 362.56 | 362.59 | 362.57 | 0  | 2  | 41    | 162  |
| 1191 |     | 1191 | 1   | 363.02 | 363.05 | 363.03 | 0  | 2  | 0     | 184  |
| 1192 | 8   | 1192 | 9   | 363.57 | 363.60 | 363.58 | 0  | 3  | 0     | 343  |
| 1194 | 3   | 1194 | 4   | 364.02 | 364.05 | 364.04 | 0  | 1  | 31    | 92   |
| 1195 | 7   | 1195 | 8   | 364.45 | 364.48 | 364.46 | 1  | 13 | 165   | 1705 |
| 1197 | 1   | 1197 | 2   | 364.88 | 364.91 | 364.89 | 9  | 3  | 2867  | 956  |
| 1198 | 6   | 1198 | 7   | 365.33 | 365.36 | 365.35 | 3  | 4  | 655   | 715  |
| 1200 |     | 1200 | 1   | 365.76 | 365.79 | 365.78 | 2  | 3  | 353   | 494  |
| 1201 | 4   | 1201 | 5   | 366.19 | 366.22 | 366.20 | 0  | 6  | 28    | 500  |
| 1202 | 4   | 1202 | 5   | 366.49 | 366.52 | 366.51 | 0  | 5  | 0     | 291  |
| 1203 | 8   | 1203 | 9   | 366.92 | 366.95 | 366.93 | 0  | 27 | 0     | 1593 |
| 1205 | 3.5 | 1205 | 4   | 367.39 | 367.41 | 367.40 | 0  | 18 | 0     | 1138 |
| 1206 | 7.5 | 1206 | 8   | 367.82 | 367.83 | 367.83 | 0  | 17 | 0     | 1513 |
| 1207 | 8   | 1207 | 9   | 368.14 | 368.17 | 368.15 | 0  | 13 | 26    | 819  |
| 1209 | 4   | 1209 | 5   | 368.63 | 368.66 | 368.64 | 0  | 12 | 0     | 831  |
| 1210 | 7.5 | 1210 | 8.5 | 369.04 | 369.07 | 369.05 | 0  | 7  | 0     | 570  |
| 1212 | 3   | 1212 | 4   | 369.51 | 369.54 | 369.52 | 0  | 3  | 0     | 307  |
| 1213 | 7   | 1213 | 8   | 369.94 | 369.97 | 369.95 | 0  | 1  | 140   | 279  |
| 1215 | 2   | 1215 | 3   | 370.39 | 370.42 | 370.41 | 0  | 1  | 0     | 271  |
| 1216 | 7   | 1216 | 8   | 370.85 | 370.88 | 370.87 | 0  | 0  | 0     | 111  |
| 1218 | 1   | 1218 | 2   | 371.28 | 371.31 | 371.29 | 0  | 0  | 0     | 82   |
| 1219 | 3   | 1219 | 4   | 371.64 | 371.67 | 371.66 | 0  | 0  | 0     | 126  |
| 1220 | 5   | 1220 | 6   | 372.01 | 372.04 | 372.02 | 0  | 0  | 0     | 45   |
| 1221 | 9   | 1222 |     | 372.44 | 372.47 | 372.45 | 0  | 1  | 0     | 126  |
| 1223 | 3   | 1223 | 4   | 372.86 | 372.89 | 372.88 | 0  | 0  | 0     | 0    |
| 1224 | 7   | 1224 | 8   | 373.29 | 373.32 | 373.30 | 0  | 0  | 0     | 36   |
| 1226 | 2   | 1226 | 3   | 373.75 | 373.78 | 373.76 | 0  | 4  | 0     | 443  |
| 1227 | 6   | 1227 | 7   | 374.17 | 374.20 | 374.19 | 0  | 9  | 0     | 633  |
| 1229 |     | 1229 | 1   | 374.60 | 374.63 | 374.61 | 0  | 1  | 0     | 131  |

| Bass River TEX <sub>86</sub> data |                     |               |                        |           |              |                |                   |                            |       |                            |       |
|-----------------------------------|---------------------|---------------|------------------------|-----------|--------------|----------------|-------------------|----------------------------|-------|----------------------------|-------|
| top (feet)                        | top (tenth of feet) | bottom (feet) | bottom (tenth of feet) | top (mbs) | bottom (mbs) | Av depth (mbs) | TEX <sub>86</sub> | T °C (Schouten et al 2002) | stdev | T °C (Schouten et al 2003) | stdev |
| 1132                              | 4                   | 1132          | 5                      | 345.16    | 345.19       | 345.17         | 0.80              | 34.6                       | 0.3   | 30.2                       | 0.1   |
| 1137                              | 8                   | 1137          | 9                      | 346.80    | 346.83       | 346.82         | 0.69              | 27.3                       | 0.3   | 26.1                       | 0.2   |
| 1143                              | 7                   | 1143          | 8                      | 348.60    | 348.63       | 348.62         | 0.74              | 30.7                       | 0.1   | 28.0                       | 0.1   |
| 1145                              | 1                   | 1145          | 2                      | 349.03    | 349.06       | 349.04         | 0.81              | 35.6                       | 0.4   | 30.7                       | 0.2   |
| 1146                              | 4                   | 1146          | 5                      | 349.42    | 349.45       | 349.44         | 0.83              | 36.4                       | 0.2   | 31.2                       | 0.1   |
| 1147                              | 7                   | 1147          | 8                      | 349.82    | 349.85       | 349.83         | 0.82              | 36.0                       | 0.0   | 30.9                       | 0.0   |
| 1149                              | 1                   | 1149          | 2                      | 350.25    | 350.28       | 350.26         | 0.84              | 37.4                       | 0.4   | 31.8                       | 0.2   |
| 1153                              | 2                   | 1153          | 3                      | 351.50    | 351.53       | 351.51         | 0.85              | 38.1                       | 0.2   | 32.1                       | 0.1   |
| 1158                              | 9                   | 1159          | 0                      | 353.23    | 353.26       | 353.25         | 0.86              | 38.4                       | 0.3   | 32.3                       | 0.2   |
| 1160                              | 7                   | 1160          | 8                      | 353.78    | 353.81       | 353.80         | 0.87              | 39.0                       | 0.3   | 32.6                       | 0.2   |
| 1162                              | 7                   | 1162          | 8                      | 354.39    | 354.42       | 354.41         | 0.87              | 39.3                       | 1.1   | 32.8                       | 0.6   |
| 1163                              | 7                   | 1163          | 8                      | 354.70    | 354.73       | 354.71         | 0.87              | 39.6                       | 0.4   | 33.0                       | 0.2   |
| 1164                              | 6                   | 1164          | 7                      | 354.97    | 355.00       | 354.99         | 0.89              | 41.0                       | 0.3   | 33.7                       | 0.2   |
| 1165                              | 5                   | 1165          | 6                      | 355.24    | 355.27       | 355.26         | 0.89              | 40.7                       | 0.3   | 33.6                       | 0.2   |
| 1166                              | 4                   | 1166          | 5                      | 355.52    | 355.55       | 355.53         | 0.88              | 40.4                       | 0.6   | 33.4                       | 0.3   |
| 1168                              | 3                   | 1168          | 4                      | 356.10    | 356.13       | 356.11         | 0.89              | 40.8                       | 0.4   | 33.6                       | 0.2   |
| 1168                              | 6                   | 1168          | 7                      | 356.19    | 356.22       | 356.20         | 0.89              | 41.0                       | 0.2   | 33.7                       | 0.1   |
| 1169                              | 2                   | 1169          | 3                      | 356.37    | 356.40       | 356.39         | 0.91              | 41.9                       | 0.6   | 34.3                       | 0.3   |
| 1169                              | 4                   | 1169          | 5                      | 356.43    | 356.46       | 356.45         | 0.91              | 41.9                       | 0.3   | 34.2                       | 0.2   |
| 1170                              | 1                   | 1170          | 2                      | 356.65    | 356.68       | 356.66         | 0.89              | 40.7                       | 0.5   | 33.6                       | 0.3   |
| 1170                              | 2                   | 1170          | 3                      | 356.68    | 356.71       | 356.69         | 0.90              | 41.5                       | 0.4   | 34.0                       | 0.2   |
| 1170                              | 4                   | 1170          | 5                      | 356.74    | 356.77       | 356.75         | 0.90              | 41.3                       | 0.4   | 33.9                       | 0.2   |
| 1170                              | 7                   | 1170          | 8                      | 356.83    | 356.86       | 356.84         | 0.90              | 41.3                       | 0.5   | 33.9                       | 0.3   |
| 1171                              | 1                   | 1171          | 2                      | 356.95    | 356.98       | 356.97         | 0.92              | 42.6                       | 0.4   | 34.6                       | 0.2   |
| 1171                              | 3                   | 1171          | 4                      | 357.01    | 357.04       | 357.03         | 0.91              | 42.2                       | 0.4   | 34.4                       | 0.2   |
| 1171                              | 6                   | 1171          | 7                      | 357.10    | 357.13       | 357.12         | 0.87              | 39.2                       | 0.4   | 32.7                       | 0.2   |
| 1171                              | 9                   | 1172          |                        | 357.20    | 357.23       | 357.21         | 0.87              | 39.5                       | 0.7   | 32.9                       | 0.4   |
| 1172                              | 2                   | 1172          | 3                      | 357.29    | 357.32       | 357.30         | 0.85              | 38.2                       | 0.4   | 32.2                       | 0.2   |
| 1172                              | 5                   | 1172          | 6                      | 357.38    | 357.41       | 357.39         | 0.80              | 35.0                       | 0.2   | 30.4                       | 0.1   |
| 1172                              | 8.5                 | 1172          | 9                      | 357.48    | 357.50       | 357.49         | 0.78              | 33.2                       | 0.0   | 29.4                       | 0.0   |
| 1173                              | 1                   | 1173          | 2                      | 357.56    | 357.59       | 357.58         | 0.76              | 31.7                       | 0.1   | 28.6                       | 0.0   |
| 1173                              | 4                   | 1173          | 5                      | 357.65    | 357.68       | 357.67         | 0.76              | 32.0                       | 0.0   | 28.7                       | 0.0   |
| 1174                              |                     | 1174          | 1                      | 357.84    | 357.87       | 357.85         | 0.77              | 32.4                       | 0.1   | 28.9                       | 0.0   |
| 1174                              | 2                   | 1174          | 3                      | 357.90    | 357.93       | 357.91         | 0.77              | 32.8                       | 0.1   | 29.2                       | 0.1   |
| 1174                              | 6                   | 1174          | 7                      | 358.02    | 358.05       | 358.03         | 0.77              | 32.6                       | 0.2   | 29.1                       | 0.1   |
| 1175                              | 2                   | 1175          | 3                      | 358.20    | 358.23       | 358.22         | 0.75              | 31.6                       | 0.0   | 28.5                       | 0.0   |
| 1176                              | 1                   | 1176          | 2                      | 358.48    | 358.51       | 358.49         | 0.75              | 31.1                       | 0.2   | 28.2                       | 0.1   |
| 1177                              | 2                   | 1177          | 3                      | 358.81    | 358.84       | 358.83         | 0.73              | 30.0                       | 0.1   | 27.6                       | 0.1   |
| 1179                              | 1                   | 1179          | 2                      | 359.39    | 359.42       | 359.40         | 0.73              | 29.9                       | 0.0   | 27.6                       | 0.0   |
| 1180                              | 3                   | 1180          | 4                      | 359.76    | 359.79       | 359.77         | 0.73              | 30.3                       | 0.6   | 27.8                       | 0.3   |
| 1184                              | 5                   | 1184          | 6                      | 361.04    | 361.07       | 361.05         | 0.77              | 32.6                       | 0.1   | 29.1                       | 0.1   |
| 1189                              | 5                   | 1189          | 6                      | 362.56    | 362.59       | 362.57         | 0.71              | 28.6                       | 0.0   | 26.8                       | 0.0   |
| 1195                              | 7                   | 1195          | 8                      | 364.45    | 364.48       | 364.46         | 0.74              | 30.9                       | 3.0   | 28.1                       | 1.7   |
| 1196                              | 4                   | 1196          | 5                      | 364.66    | 364.69       | 364.68         | 0.74              | 30.4                       | 0.1   | 27.9                       | 0.1   |
| 1201                              | 4                   | 1201          | 5                      | 366.19    | 366.22       | 366.20         | 0.74              | 30.5                       | 0.2   | 27.9                       | 0.1   |

| Bass River Dinocyst $\delta^{13}\text{C}$ data |            |                      |               |                         |           |              |             |                                |       |
|------------------------------------------------|------------|----------------------|---------------|-------------------------|-----------|--------------|-------------|--------------------------------|-------|
|                                                | top (feet) | top (tenths of feet) | bottom (feet) | bottom (tenths of feet) | top (mbs) | bottom (mbs) | Depth (mbs) | Dinocyst $\delta^{13}\text{C}$ | stdev |
| 1150                                           | 4          | 1150                 | 5             | 350.64                  | 350.67    | 350.66       | -26.67      |                                |       |
| 1154                                           | 7          | 1154                 | 8             | 351.95                  | 351.98    | 351.97       | -26.64      |                                |       |
| 1158                                           | 9          | 1159                 | 0             | 353.23                  | 353.26    | 353.25       | -27.49      |                                |       |
| 1161                                           | 7          | 1161                 | 8             | 354.09                  | 354.12    | 354.10       | -27.66      |                                |       |
| 1165                                           | 5          | 1165                 | 6             | 355.24                  | 355.27    | 355.26       | -28.09      | 0.13                           |       |
| 1167                                           |            | 1167                 | 1             | 355.70                  | 355.73    | 355.72       | -27.43      |                                |       |
| 1168                                           | 3          | 1168                 | 4             | 356.10                  | 356.13    | 356.11       | -28.14      |                                |       |
| 1168                                           | 6          | 1168                 | 7             | 356.19                  | 356.22    | 356.20       | -28.30      |                                |       |
| 1168                                           | 9          | 1169                 |               | 356.28                  | 356.31    | 356.30       | -27.64      |                                |       |
| 1169                                           | 2          | 1169                 | 3             | 356.37                  | 356.40    | 356.39       | -28.26      |                                |       |
| 1169                                           | 4          | 1169                 | 5             | 356.43                  | 356.46    | 356.45       | -27.63      | 0.05                           |       |
| 1170                                           | 1          | 1170                 | 2             | 356.65                  | 356.68    | 356.66       | -28.14      |                                |       |
| 1170                                           | 2          | 1170                 | 3             | 356.68                  | 356.71    | 356.69       | -28.52      |                                |       |
| 1170                                           | 4          | 1170                 | 5             | 356.74                  | 356.77    | 356.75       | -28.80      |                                |       |
| 1170                                           | 7          | 1170                 | 8             | 356.83                  | 356.86    | 356.84       | -28.12      |                                |       |
| 1171                                           | 1          | 1171                 | 2             | 356.95                  | 356.98    | 356.97       | -28.45      | 0.52                           |       |
| 1171                                           | 3          | 1171                 | 4             | 357.01                  | 357.04    | 357.03       | -27.79      | 0.13                           |       |
| 1171                                           | 6          | 1171                 | 7             | 357.10                  | 357.13    | 357.12       | -25.73      | 0.18                           |       |
| 1171                                           | 9          | 1172                 |               | 357.20                  | 357.23    | 357.21       | -25.61      | 0.08                           |       |
| 1172                                           | 2          | 1172                 | 3             | 357.29                  | 357.32    | 357.30       | -25.27      | 0.06                           |       |
| 1172                                           | 5          | 1172                 | 6             | 357.38                  | 357.41    | 357.39       | -24.24      | 0.06                           |       |
| 1172                                           | 8.5        | 1172                 | 9             | 357.48                  | 357.50    | 357.49       | -24.16      | 0.06                           |       |
| 1173                                           | 1          | 1173                 | 2             | 357.56                  | 357.59    | 357.58       | -23.84      |                                |       |
| 1173                                           | 4          | 1173                 | 5             | 357.65                  | 357.68    | 357.67       | -23.80      |                                |       |
| 1173                                           | 7          | 1173                 | 8             | 357.74                  | 357.77    | 357.76       | -24.21      | 0.21                           |       |
| 1174                                           |            | 1174                 | 1             | 357.84                  | 357.87    | 357.85       | -24.10      |                                |       |
| 1174                                           | 2          | 1174                 | 3             | 357.90                  | 357.93    | 357.91       | -23.76      |                                |       |
| 1174                                           | 6          | 1174                 | 7             | 358.02                  | 358.05    | 358.03       | -23.81      |                                |       |
| 1174                                           | 9          | 1175                 |               | 358.11                  | 358.14    | 358.12       | -24.04      |                                |       |
| 1176                                           | 1          | 1176                 | 2             | 358.48                  | 358.51    | 358.49       | -23.86      |                                |       |
| 1178                                           | 1          | 1178                 | 2             | 359.08                  | 359.12    | 359.10       | -21.62      | 0.19                           |       |
| 1180                                           | 3          | 1180                 | 4             | 359.76                  | 359.79    | 359.77       | -23.00      | 0.19                           |       |
| 1183                                           | 1          | 1183                 | 2             | 360.61                  | 360.64    | 360.62       | -22.61      |                                |       |

Table 1b. Wilson Lake

| Wilson Lake<br><i>Apectodinium</i> data |           |                       |
|-----------------------------------------|-----------|-----------------------|
| Depth (ft)                              | Depth (m) | % <i>Apectodinium</i> |
| 300.23                                  | 91.51     | 14                    |
| 302.60                                  | 92.23     | 2                     |
| 304.95                                  | 92.95     | 0                     |
| 306.50                                  | 93.42     | 1                     |
| 307.84                                  | 93.83     | 0                     |
| 309.72                                  | 94.40     | 1                     |
| 311.00                                  | 94.79     | 3                     |
| 313.13                                  | 95.44     | 35                    |
| 314.82                                  | 95.96     | 25                    |
| 318.05                                  | 96.94     | 46                    |
| 319.75                                  | 97.46     | 46                    |
| 321.16                                  | 97.89     | 4                     |
| 322.84                                  | 98.40     | 3                     |
| 324.47                                  | 98.90     | 4                     |
| 326.21                                  | 99.43     | 5                     |
| 327.85                                  | 99.93     | 8                     |
| 330.44                                  | 100.72    | 4                     |
| 332.11                                  | 101.23    | 4                     |
| 333.75                                  | 101.73    | 8                     |
| 335.27                                  | 102.19    | 3                     |
| 336.85                                  | 102.67    | 14                    |
| 338.40                                  | 103.14    | 4                     |
| 339.97                                  | 103.62    | 5                     |
| 341.45                                  | 104.07    | 2                     |
| 343.10                                  | 104.58    | 6                     |
| 344.63                                  | 105.04    | 7                     |
| 346.17                                  | 105.51    | 8                     |
| 347.80                                  | 106.01    | 11                    |
| 350.70                                  | 106.89    | 19                    |
| 352.37                                  | 107.40    | 14                    |
| 352.70                                  | 107.50    | 15                    |
| 354.00                                  | 107.90    | 6                     |
| 355.23                                  | 108.27    | 22                    |
| 356.26                                  | 108.59    | 33                    |
| 356.60                                  | 108.69    | 55                    |
| 356.92                                  | 108.79    | 30                    |
| 357.24                                  | 108.89    | 31                    |
| 357.54                                  | 108.98    | 25                    |
| 357.75                                  | 109.04    | 35                    |
| 358.70                                  | 109.33    | 43                    |
| 359.00                                  | 109.42    | 51                    |
| 359.50                                  | 109.58    | 32                    |
| 360.12                                  | 109.76    | 42                    |
| 360.25                                  | 109.80    | 41                    |
| 360.65                                  | 109.93    | 53                    |
| 361.05                                  | 110.05    | 40                    |
| 361.10                                  | 110.06    | 42                    |
| 361.15                                  | 110.08    | 33                    |
| 361.35                                  | 110.14    | 40                    |
| 361.43                                  | 110.16    | 38                    |
| 361.45                                  | 110.17    | 49                    |
| 361.70                                  | 110.25    | 37                    |

|        |        |    |
|--------|--------|----|
| 362.00 | 110.34 | 31 |
| 362.25 | 110.41 | 26 |
| 362.65 | 110.54 | 4  |
| 362.90 | 110.61 | 0  |
| 363.25 | 110.72 | 0  |
| 363.30 | 110.73 | 0  |
| 363.55 | 110.81 | 1  |
| 363.95 | 110.93 | 2  |
| 364.15 | 110.99 | 0  |
| 364.50 | 111.10 | 0  |
| 364.85 | 111.21 | 0  |
| 365.35 | 111.36 | 0  |
| 365.85 | 111.51 | 4  |
| 366.20 | 111.62 | 3  |
| 366.85 | 111.82 | 1  |
| 367.35 | 111.97 | 0  |
| 367.85 | 112.12 | 0  |
| 368.50 | 112.32 | 0  |
| 369.10 | 112.50 | 0  |
| 369.40 | 112.59 | 0  |
| 369.95 | 112.76 | 0  |

| Wilson Lake TEX <sub>86</sub> data |           |                   |                            |                            |                                           |
|------------------------------------|-----------|-------------------|----------------------------|----------------------------|-------------------------------------------|
| Depth (ft)                         | Depth (m) | TEX <sub>86</sub> | T °C (Schouten et al 2003) | T °C (Schouten et al 2003) | reference (for previously published data) |
| 300.23                             | 91.51     | 0.79              | 34.1                       | 29.9                       | from Zachos et al., 2006                  |
| 304.95                             | 92.95     | 0.74              | 31.0                       | 28.2                       | from Zachos et al., 2006                  |
| 307.84                             | 93.83     | 0.77              | 32.3                       | 28.9                       | from Zachos et al., 2006                  |
| 314.82                             | 95.96     | 0.70              | 28.2                       | 26.6                       | from Zachos et al., 2006                  |
| 318.05                             | 96.94     | 0.87              | 39.3                       | 32.8                       | from Zachos et al., 2006                  |
| 321.16                             | 97.89     | 0.87              | 39.6                       | 33.0                       | from Zachos et al., 2006                  |
| 324.47                             | 98.90     | 0.89              | 40.8                       | 33.6                       | from Zachos et al., 2006                  |
| 327.85                             | 99.93     | 0.89              | 40.4                       | 33.4                       | from Zachos et al., 2006                  |
| 332.11                             | 101.23    | 0.89              | 40.5                       | 33.5                       | from Zachos et al., 2006                  |
| 338.40                             | 103.14    | 0.91              | 42.1                       | 34.3                       | from Zachos et al., 2006                  |
| 343.10                             | 104.58    | 0.89              | 41.0                       | 33.7                       | from Zachos et al., 2006                  |
| 346.17                             | 105.51    | 0.86              | 38.4                       | 32.3                       | from Zachos et al., 2006                  |
| 350.42                             | 106.81    | 0.88              | 40.2                       | 33.3                       | from Zachos et al., 2006                  |
| 354.00                             | 107.90    | 0.93              | 43.4                       | 35.1                       | from Zachos et al., 2006                  |
| 355.25                             | 108.28    | 0.92              | 42.6                       | 34.7                       |                                           |
| 356.35                             | 108.62    | 0.91              | 41.8                       | 34.2                       |                                           |
| 356.75                             | 108.74    | 0.91              | 41.9                       | 34.2                       |                                           |
| 357.35                             | 108.92    | 0.91              | 41.7                       | 34.1                       |                                           |
| 357.75                             | 109.04    | 0.89              | 40.9                       | 33.7                       |                                           |
| 358.75                             | 109.35    | 0.86              | 38.4                       | 32.3                       |                                           |
| 359.05                             | 109.44    | 0.85              | 38.2                       | 32.2                       |                                           |
| 360.10                             | 109.76    | 0.78              | 33.4                       | 29.5                       | from Zachos et al., 2006                  |
| 360.25                             | 109.80    | 0.84              | 37.2                       | 31.6                       |                                           |
| 360.65                             | 109.93    | 0.78              | 33.3                       | 29.5                       |                                           |
| 361.05                             | 110.05    | 0.73              | 29.9                       | 27.6                       |                                           |
| 361.15                             | 110.08    | 0.76              | 31.7                       | 28.6                       |                                           |
| 361.35                             | 110.14    | 0.72              | 29.5                       | 27.3                       |                                           |
| 361.45                             | 110.17    | 0.71              | 28.7                       | 26.9                       |                                           |
| 361.71                             | 110.25    | 0.70              | 28.0                       | 26.5                       | from Zachos et al., 2006                  |
| 361.75                             | 110.26    | 0.70              | 28.2                       | 26.6                       |                                           |
| 362.05                             | 110.35    | 0.69              | 27.4                       | 26.2                       |                                           |
| 362.25                             | 110.41    | 0.71              | 28.4                       | 26.7                       |                                           |
| 362.65                             | 110.54    | 0.71              | 28.3                       | 26.7                       |                                           |
| 362.95                             | 110.63    | 0.70              | 28.2                       | 26.6                       |                                           |
| 363.25                             | 110.72    | 0.71              | 28.5                       | 26.8                       |                                           |
| 363.29                             | 110.73    | 0.66              | 25.2                       | 25.0                       | from Zachos et al., 2006                  |
| 363.55                             | 110.81    | 0.68              | 26.4                       | 25.6                       |                                           |
| 363.95                             | 110.93    | 0.70              | 28.2                       | 26.6                       |                                           |
| 364.55                             | 111.11    | 0.70              | 28.1                       | 26.6                       |                                           |
| 364.85                             | 111.21    | 0.69              | 27.7                       | 26.3                       |                                           |
| 365.41                             | 111.38    | 0.70              | 28.0                       | 26.5                       |                                           |
| 365.49                             | 111.40    | 0.72              | 29.3                       | 27.3                       | from Zachos et al., 2006                  |
| 365.88                             | 111.52    | 0.70              | 28.2                       | 26.6                       |                                           |
| 366.18                             | 111.61    | 0.70              | 28.3                       | 26.7                       |                                           |
| 366.85                             | 111.82    | 0.71              | 28.9                       | 27.0                       |                                           |
| 367.38                             | 111.98    | 0.71              | 28.9                       | 27.0                       |                                           |
| 367.82                             | 112.11    | 0.73              | 29.8                       | 27.5                       | from Zachos et al., 2006                  |
| 368.53                             | 112.33    | 0.71              | 28.9                       | 27.0                       |                                           |
| 369.10                             | 112.50    | 0.71              | 28.6                       | 26.9                       |                                           |
| 369.39                             | 112.59    | 0.70              | 27.9                       | 26.5                       | from Zachos et al., 2006                  |
| 369.65                             | 112.67    | 0.69              | 27.1                       | 26.0                       |                                           |
| 370.00                             | 112.78    | 0.68              | 26.6                       | 25.7                       |                                           |

| Wilson Lake Dinocyst $\delta^{13}\text{C}$ data |           |                                |       |
|-------------------------------------------------|-----------|--------------------------------|-------|
| Depth (ft)                                      | Depth (m) | Dinocyst $\delta^{13}\text{C}$ | stdev |
| 307.84                                          | 93.83     | -22.96                         |       |
| 311.00                                          | 94.79     | -25.19                         |       |
| 314.82                                          | 95.96     | -24.67                         |       |
| 319.75                                          | 97.46     | -26.82                         |       |
| 326.21                                          | 99.43     | -27.16                         |       |
| 327.85                                          | 99.93     | -27.61                         |       |
| 330.44                                          | 100.72    | -26.69                         |       |
| 333.75                                          | 101.73    | -27.45                         |       |
| 336.85                                          | 102.67    | -26.91                         |       |
| 339.97                                          | 103.62    | -26.87                         |       |
| 352.37                                          | 107.40    | -27.89                         |       |
| 352.70                                          | 107.50    | -27.87                         | 0.12  |
| 354.00                                          | 107.90    | -27.72                         |       |
| 355.23                                          | 108.27    | -27.77                         |       |
| 356.26                                          | 108.59    | -27.64                         |       |
| 356.60                                          | 108.69    | -27.70                         |       |
| 356.92                                          | 108.79    | -26.62                         |       |
| 357.24                                          | 108.89    | -27.36                         |       |
| 357.54                                          | 108.98    | -26.89                         |       |
| 357.75                                          | 109.04    | -26.29                         |       |
| 358.70                                          | 109.33    | -26.19                         |       |
| 359.00                                          | 109.42    | -25.99                         |       |
| 359.50                                          | 109.58    | -25.85                         |       |
| 360.12                                          | 109.76    | -25.31                         |       |
| 360.25                                          | 109.80    | -25.46                         | 0.15  |
| 360.65                                          | 109.93    | -24.39                         | 0.12  |
| 361.05                                          | 110.05    | -23.13                         | 0.16  |
| 361.10                                          | 110.06    | -22.56                         |       |
| 361.15                                          | 110.08    | -23.02                         |       |
| 361.35                                          | 110.14    | -24.37                         |       |
| 361.43                                          | 110.16    | -23.48                         |       |
| 361.45                                          | 110.17    | -23.44                         | 0.03  |
| 361.70                                          | 110.25    | -22.45                         | 0.24  |
| 362.00                                          | 110.34    | -23.85                         |       |
| 362.25                                          | 110.41    | -23.33                         |       |
| 362.65                                          | 110.54    | -23.07                         | 0.09  |
| 362.90                                          | 110.61    | -20.82                         | 0.24  |
| 363.25                                          | 110.72    | -21.55                         |       |
| 363.30                                          | 110.73    | -20.89                         | 0.08  |
| 363.55                                          | 110.81    | -21.69                         |       |
| 363.95                                          | 110.93    | -22.49                         |       |
| 364.15                                          | 110.99    | -22.35                         |       |
| 364.50                                          | 111.10    | -22.09                         | 0.06  |
| 364.85                                          | 111.21    | -22.94                         |       |
| 365.35                                          | 111.36    | -23.82                         |       |
| 365.85                                          | 111.51    | -23.18                         |       |
| 366.20                                          | 111.62    | -23.25                         |       |
| 366.85                                          | 111.82    | -22.80                         |       |
| 367.35                                          | 111.97    | -23.34                         |       |
| 367.85                                          | 112.12    | -22.84                         | 0.02  |
| 368.50                                          | 112.32    | -23.28                         |       |
| 369.10                                          | 112.50    | -21.64                         |       |
| 369.40                                          | 112.59    | -21.17                         |       |
| 369.95                                          | 112.76    | -19.96                         |       |



Table 1c. North Sea FINA Well 30/14-1

| North Sea<br><i>Apectodinium</i> data |      |              |                       |
|---------------------------------------|------|--------------|-----------------------|
| feet                                  | inch | Depth (mbsf) | % <i>Apectodinium</i> |
| 9425                                  | 4    | 2872.84      | 0                     |
| 9445                                  | 0    | 2878.84      | 0                     |
| 9452                                  | 6    | 2881.12      | 1                     |
| 9465                                  | 0    | 2884.93      | 5                     |
| 9485                                  | 0    | 2891.03      | 0                     |
| 9505                                  | 0    | 2897.12      | 52                    |
| 9525                                  | 0    | 2903.22      | 31                    |
| 9532                                  | 6    | 2905.51      | 62                    |
| 9545                                  | 0    | 2909.32      | 39                    |
| 9555                                  | 0    | 2912.36      | 41                    |
| 9565                                  | 0    | 2915.41      | 68                    |
| 9579                                  | 0    | 2919.68      | 59                    |
| 9587                                  | 0    | 2922.12      | 65                    |
| 9595                                  | 0    | 2924.56      | 57                    |
| 9603                                  | 0    | 2926.99      | 35                    |
| 9604                                  | 0    | 2927.30      | 16                    |
| 9606                                  | 0    | 2927.91      | 0                     |
| 9608                                  | 0    | 2928.52      | 0                     |
| 9610                                  | 0    | 2929.13      | 0                     |
| 9627                                  | 6    | 2934.46      | 0                     |
| 9642                                  | 6    | 2939.03      | 0                     |

| North Sea $\delta^{13}\text{C}$ TOC |      |              |                           |
|-------------------------------------|------|--------------|---------------------------|
| feet                                | inch | Depth (mbsf) | $\delta^{13}\text{C}$ TOC |
| 9465                                |      | 2884.93      | -26.89                    |
| 9505                                |      | 2897.12      | -29.16                    |
| 9525                                |      | 2903.22      | -28.62                    |
| 9552                                | 6    | 2911.60      | -31.21                    |
| 9555                                |      | 2912.36      | -31.68                    |
| 9557                                | 6    | 2913.13      | -31.73                    |
| 9560                                |      | 2913.89      | -31.49                    |
| 9562                                | 6    | 2914.65      | -30.53                    |
| 9565                                |      | 2915.41      | -31.79                    |
| 9565                                | 2    | 2915.46      | -31.26                    |
| 9567                                | 6    | 2916.17      | -32.11                    |
| 9570                                |      | 2916.94      | -31.76                    |
| 9572                                | 6    | 2917.70      | -30.56                    |
| 9575                                |      | 2918.46      | -31.70                    |
| 9576                                |      | 2918.76      | -31.45                    |
| 9577                                |      | 2919.07      | -28.28                    |
| 9579                                |      | 2919.68      | -29.57                    |
| 9581                                |      | 2920.29      | -29.63                    |
| 9583                                |      | 2920.90      | -28.58                    |
| 9587                                |      | 2922.12      | -29.76                    |
| 9589                                |      | 2922.73      | -29.59                    |
| 9591                                |      | 2923.34      | -28.92                    |
| 9593                                |      | 2923.95      | -29.13                    |
| 9595                                |      | 2924.56      | -28.25                    |
| 9597                                |      | 2925.17      | -28.38                    |
| 9599                                |      | 2925.78      | -27.28                    |
| 9601                                |      | 2926.38      | -26.67                    |
| 9603                                |      | 2926.99      | -26.11                    |
| 9604                                |      | 2927.30      | -26.25                    |
| 9606                                |      | 2927.91      | -26.09                    |
| 9608                                |      | 2928.52      | -26.33                    |
| 9610                                |      | 2929.13      | -26.31                    |
| 9642                                | 6    | 2939.03      | -25.44                    |
